# Supplementary material for: Hydrothermal synthesis and enhanced photoluminescence of Tb3+ in Ce3+/Tb3+ doped KGdF4 nanocrystals
Source: Royal Society of Chemistry journal article supplement (doi:10.1039/c1jm10832h), 2011-01-01
Supplement: c1jm10832h.pdf [file c1jm10832h.pdf]

## **Supporting Information**

**Title: Hydrothermal synthesis and enhanced photoluminescence of Tb<sup>3+</sup> in  
Ce<sup>3+</sup>/Tb<sup>3+</sup> doped KGdF<sub>4</sub> nanocrystals**

**Author(s): Chunyan Cao,<sup>ab</sup> Hyun Kyoung Yang,<sup>a</sup> Jong Won Chung,<sup>a</sup> Byung Kee Moon,<sup>a</sup>**

**Byung Chun Choi,<sup>a</sup> Jung Hyun Jeong <sup>\*a</sup> and Kwang Ho Kim<sup>c</sup>**

*<sup>a</sup>Department of Physics, Pukyong National University, Busan 608-737, Republic of Korea.*

*E-mail: [jhjeong@pknu.ac.kr](mailto:jhjeong@pknu.ac.kr)*

*<sup>b</sup>College of Mathematics and Physics, Jingtangshan University, Ji'an 343009, P. R. China*

*<sup>c</sup>School of Materials Science and Engineering, Pusan National University, Busan 609-735,  
Republic of Korea*

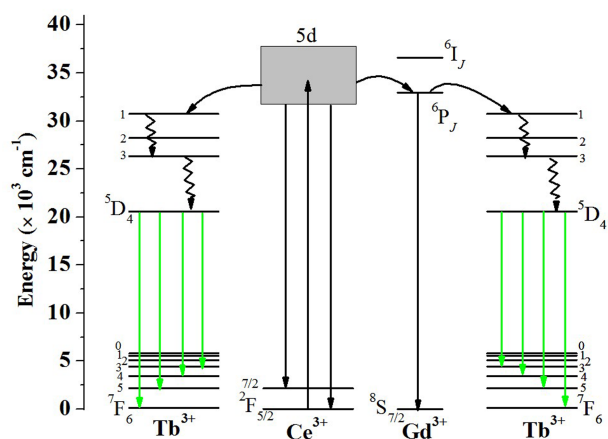

**Fig. S1** Schematic energy level diagram and luminescent mechanism in  $\text{Ce}^{3+}/\text{Tb}^{3+}$  co-doped  $\text{KGdF}_4$ .

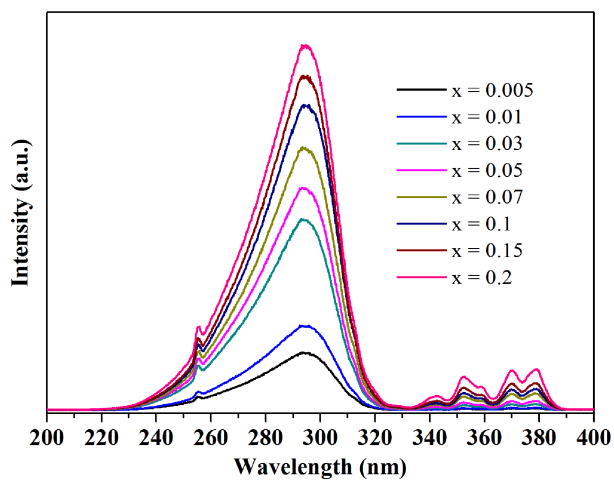

**Fig. S2** PLE spectra of  $\text{KGd}_{0.8-x}\text{Ce}_{0.2}\text{Tb}_x\text{F}_4$ .

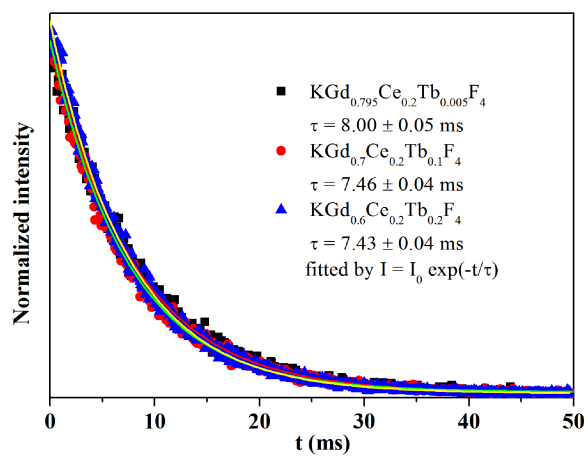

**Fig. S3** Representative luminescence decay curves of  $\text{KGd}_{0.8-x}\text{Ce}_{0.2}\text{Tb}_x\text{F}_4$ .
